# Supplementary material for: The Impact of Head-Up Tilt Sleeping on Orthostatic Tolerance: A Scoping Review
Source: MDPI journal article supplement (doi:10.3390/biology12081108), 2023-08-09
Supplement: s1 [file s1]

## Supplementary tables

**Supplementary Table S1.** Database search strategy consisting of part 1, terms to define sleeping in a head-up tilt position, and part 2, autonomic nervous system outcome measures.

| Database              | Search terms                                                                                                                                                                                                                                                                                                                                                                                                                                                                                                                                                                                                                                                                                                                                                                                                                                                                                                                                                                                                                                                                                                                                                                                                                         |
|-----------------------|--------------------------------------------------------------------------------------------------------------------------------------------------------------------------------------------------------------------------------------------------------------------------------------------------------------------------------------------------------------------------------------------------------------------------------------------------------------------------------------------------------------------------------------------------------------------------------------------------------------------------------------------------------------------------------------------------------------------------------------------------------------------------------------------------------------------------------------------------------------------------------------------------------------------------------------------------------------------------------------------------------------------------------------------------------------------------------------------------------------------------------------------------------------------------------------------------------------------------------------|
| <b>Pubmed</b>         | <p><u>Part 1</u><br/> ("Sleep"[Mesh] OR sleep*[Title/Abstract] OR night*[Title/Abstract] OR nocturnal[Title/Abstract])<br/> AND<br/> (head up[Title/Abstract] OR head-up[Title/Abstract] OR tilt*[Title/Abstract] OR anti-trendelenburg[Title/Abstract] OR reverse trendelenburg[Title/Abstract] OR incline*[Title/Abstract] OR ((bed[Title/Abstract] OR head-of-bed[Title/Abstract]) AND (elevat*[Title/Abstract])))</p> <p><u>Part 2</u><br/> ("Hemodynamics"[Mesh] OR Hypotension"[Mesh] OR "Hypertension"[Mesh]<br/> OR "Edema"[Mesh] OR "Urinary Tract Physiological Phenomena"[Mesh] OR "Nocturia"[Mesh] OR "Water-Electrolyte Balance"[Mesh] OR "Water-Electrolyte Imbalance"[Mesh] OR "Syncope"[Mesh] OR autonom*[Title/Abstract] OR blood pressure[Title/Abstract] OR hypotensi*[Title/Abstract] OR hypertensi*[Title/Abstract] OR syncope[Title/Abstract] OR Hemodynamic*[Title/Abstract] OR Haemodynamic*[Title/Abstract] OR Cardiac Output[Title/Abstract] OR Stroke Volume[Title/Abstract] OR Edema[Title/Abstract] OR Oedema[Title/Abstract] OR Nycturia[Title/Abstract] OR Nocturia[Title/Abstract] OR Vascular resistance[Title/Abstract] OR Vasodilatation[Title/Abstract] OR Vasoconstriction[Title/Abstract])</p> |
| <b>Embase</b>         | <p><u>Part 1</u><br/> ((exp sleep/ OR<br/> (sleep* OR night* OR nocturnal).ti,ab,kf.)<br/> AND<br/> (head up OR head-up OR tilt* OR anti-trendelenburg OR reverse Trendelenburg OR incline* OR ((head-of-bed OR bed) AND elevat*)).ti,ab,kf.)</p> <p><u>Part 1</u><br/> (cardiovascular function/ or blood vessel function/ or cardiovascular effect/ or cardiovascular performance/ or cardiovascular reflex/ or cardiovascular response/ or circulation/ or heart function/ or hemodynamics/ or exp abnormal blood pressure/ or edema/ or peripheral edema/ or nocturia/ or exp faintness/ or exp electrolyte disturbance/ or urinary tract function/ or bladder function/ or diuresis/ or kidney function/ or urine acidification/ or urine flow rate/ or autonomic neuropathy/)<br/> OR (autonom* OR blood pressure OR hypotensi* OR hypertensi* OR syncope OR Hemodynamic* OR Haemodynamic* OR Cardiac Output OR Stroke Volume OR Edema OR Oedema OR Nycturia OR Nocturia OR Vascular resistance OR Vasodilatation OR Vasoconstriction).ti,ab,kf.)</p>                                                                                                                                                                          |
| <b>Cochrane</b>       | Same as Pubmed                                                                                                                                                                                                                                                                                                                                                                                                                                                                                                                                                                                                                                                                                                                                                                                                                                                                                                                                                                                                                                                                                                                                                                                                                       |
| <b>Web of science</b> | <p><u>Part 1</u><br/> ((TS=sleep* OR TS=night* OR TS=nocturnal)<br/> AND<br/> ((TS="head up" OR TS=head-up OR TS=tilt* OR TS=anti-trendelenburg OR TS="reverse trendelenburg" OR TS=incline*) OR<br/> ((TS=bed OR TS=head-of-bed) AND TS=elevat*)))</p> <p><u>Part 2</u><br/> TS=Syncope OR TS=autonom* OR TS="blood pressure" OR TS=hypotensi* OR TS=hypertensi* OR TS=syncope OR TS=Hemodynamic* OR TS=Haemodynamic* OR TS="Cardiac Output" OR TS="Stroke Volume" OR TS=Edema OR TS=Oedema OR TS=Nycturia OR TS=Nocturia OR TS="Vascular resistance" OR TS=Vasodilatation OR TS=Vasoconstriction</p>                                                                                                                                                                                                                                                                                                                                                                                                                                                                                                                                                                                                                               |
